# Supplementary material for: Euxinic conditions and altered biogeochemical cycles in a Patagonian fjord influenced by tectonic activity
Source: Research Square preprint supplement (doi:10.21203/rs.3.rs-8735657/v1), 2026-02-12
Supplement: Supplementary file 1 [file fb5940530cf3b577eee4e615.docx]

### Supplementary material

Euxinic conditions and altered biogeochemical cycles in a Patagonian fjord influenced by tectonic activity.

**Iván Pérez-Santos1,2*, Paulina Montero3,2, Marcelo H. Gutiérrez2,4, Gerdhard L. Jessen2,5, Alexander Galán6,7, Laura Farías4,8,9, Leonardo Castro2,4, Camilo Rodriguéz-Villegas1, Patricio Díaz1,10, Claudia Aracena11,Elías Pinilla12,13, Karen Sanzana8,14, Aranza L. Pérez3, Karina Fuentes2, C. Asmut2, Guido Mansilla1, Gabriel Soto13, Cynthia Urrutia15,16, Claudio Navarro15, Matías Castro4,17, Laura A. Bristow18, Morten Larsen19, Osvaldo Ulloa4,17.**

1Centro i-mar, Universidad de Los Lagos, Puerto Montt, Chile.

2Center for Oceanographic Research COPAS Coastal, Universidad de Concepción, Concepción, Chile.

3Patagonia Ecosystem Research Center (CIEP), Coyhaique, Chile.

4Department of Oceanography, Faculty of Natural Sciences and Oceanography, Universidad de Concepción, Concepción, Chile.

5Institute of Marine and Limnological Sciences (ICML), Universidad Austral, Valdivia, Chile.

6Center for Advanced Studies Research in Maule (CIEAM), Office of the Pro-Vice-Chancellor for Research and Graduate Studies, Universidad Católica del Maule, Talca, Chile.

7Regional Center for Environmental Research (CREA), Universidad Católica de la Santísima Concepción, Concepción, Chile.

8Coastal Social-Ecological Millennium Institute (SECOS), Santiago, Chile.

9Center for Climate and Resilience Research (CR2), Santiago, Chile.

10Center for Biotechnology and Bioengineering (CeBiB), Universidad de Los Lagos, Puerto Montt, Chile.

11Center for Research on Natural Resources and Sustainability (CIRENYS), Universidad Bernardo O'Higgins, Santiago, Chile.

12University of Maine, Maine, United States of America.

13Fisheries Development Institute (IFOP), Putemún Aquaculture Technology Center (CTPA), Castro, Chile.

14Graduate Program in Oceanography, Department of Oceanography, Faculty of Natural Sciences and Oceanography, Universidad de Concepción, Concepción, Chile.

15Department of Natural Resources and the Environment, Universidad de Los Lagos, Puerto Montt 5480000, Chile.

16Scientific and Technological Bioresource Nucleus (BIOREN), Universidad de La Frontera, Temuco 4811230, Chile.

17Millennium Institute of Oceanography (IMO), Concepción, Chile.

18Department of Marine Sciences, University of Gothenburg, Gothenburg, Sweden.

19Nordcee, Department of Biology, University of Southern Denmark, Odense, Denmark.

*Corresponding author: Iván Pérez-Santos ([ivan.perez@ulagos.cl)](about:blank)


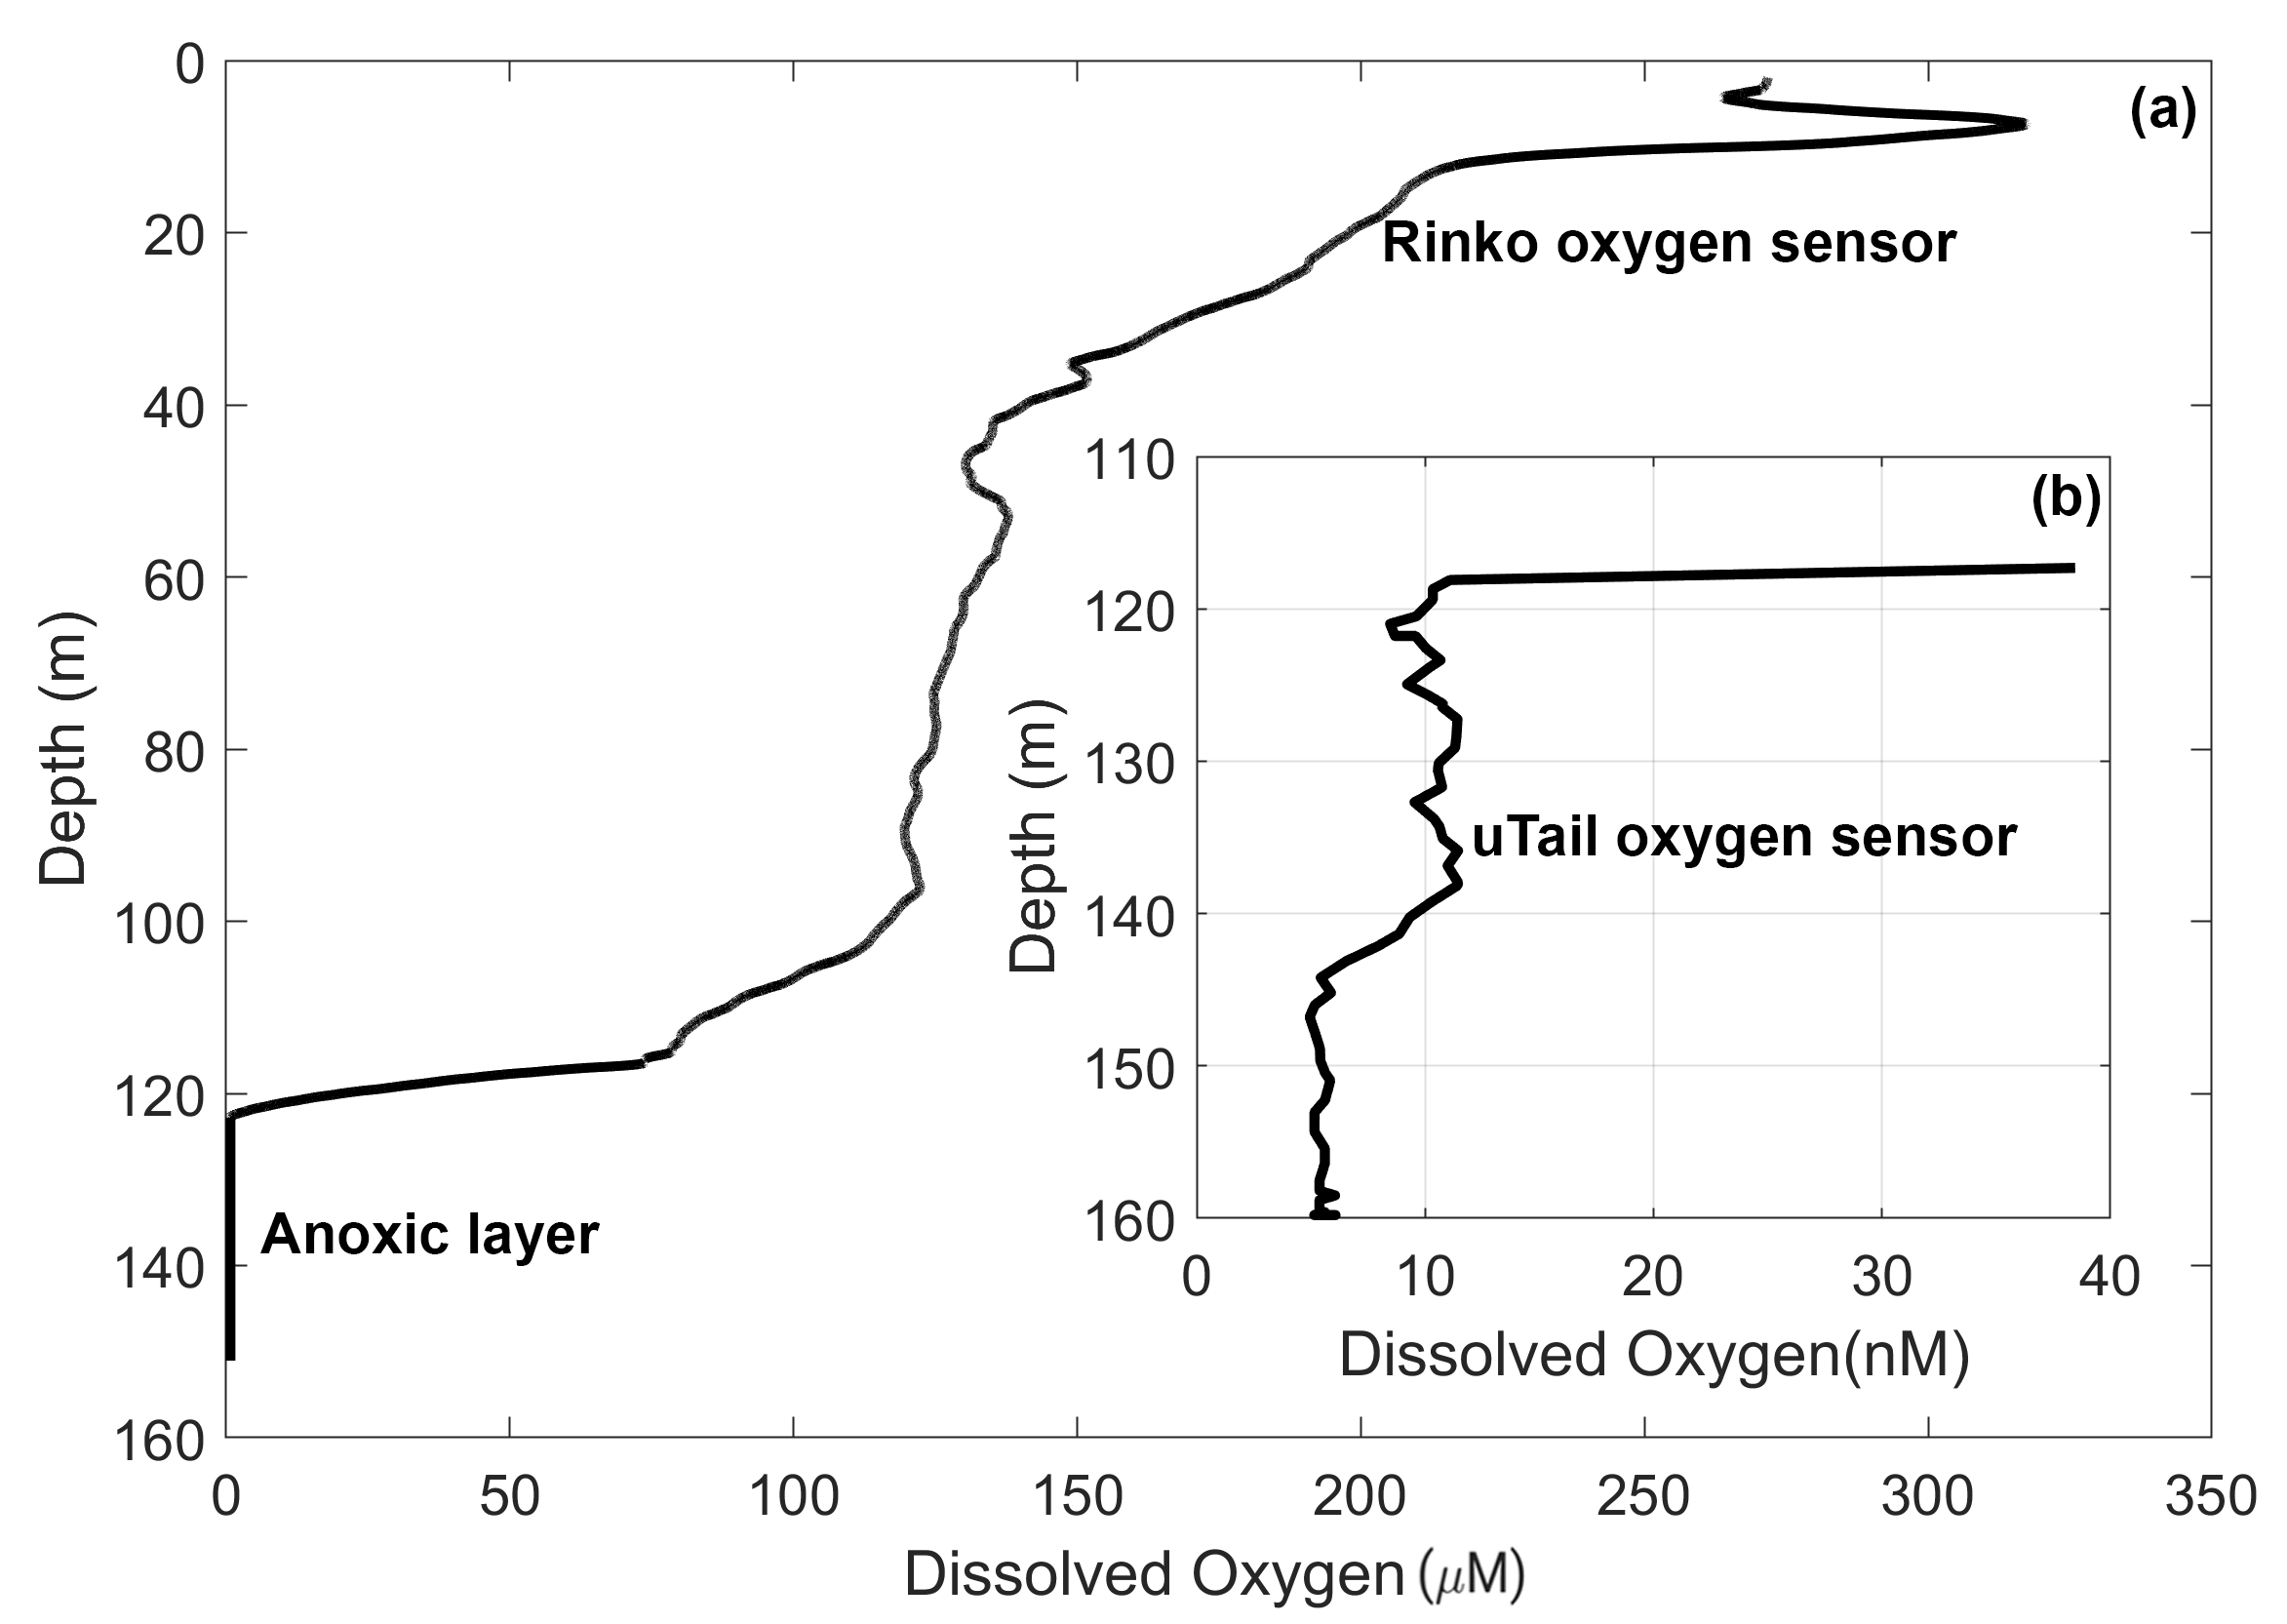


**Supplementary Figure 1**. Dissolved oxygen profiles measured using: (**a**) a RINKO oxygen sensor installed in the

VMP-250 Microprofiler; and (**b**) a uTail trace oxygen sensor, in Quitralco

Fjord basin, December 2024.

**
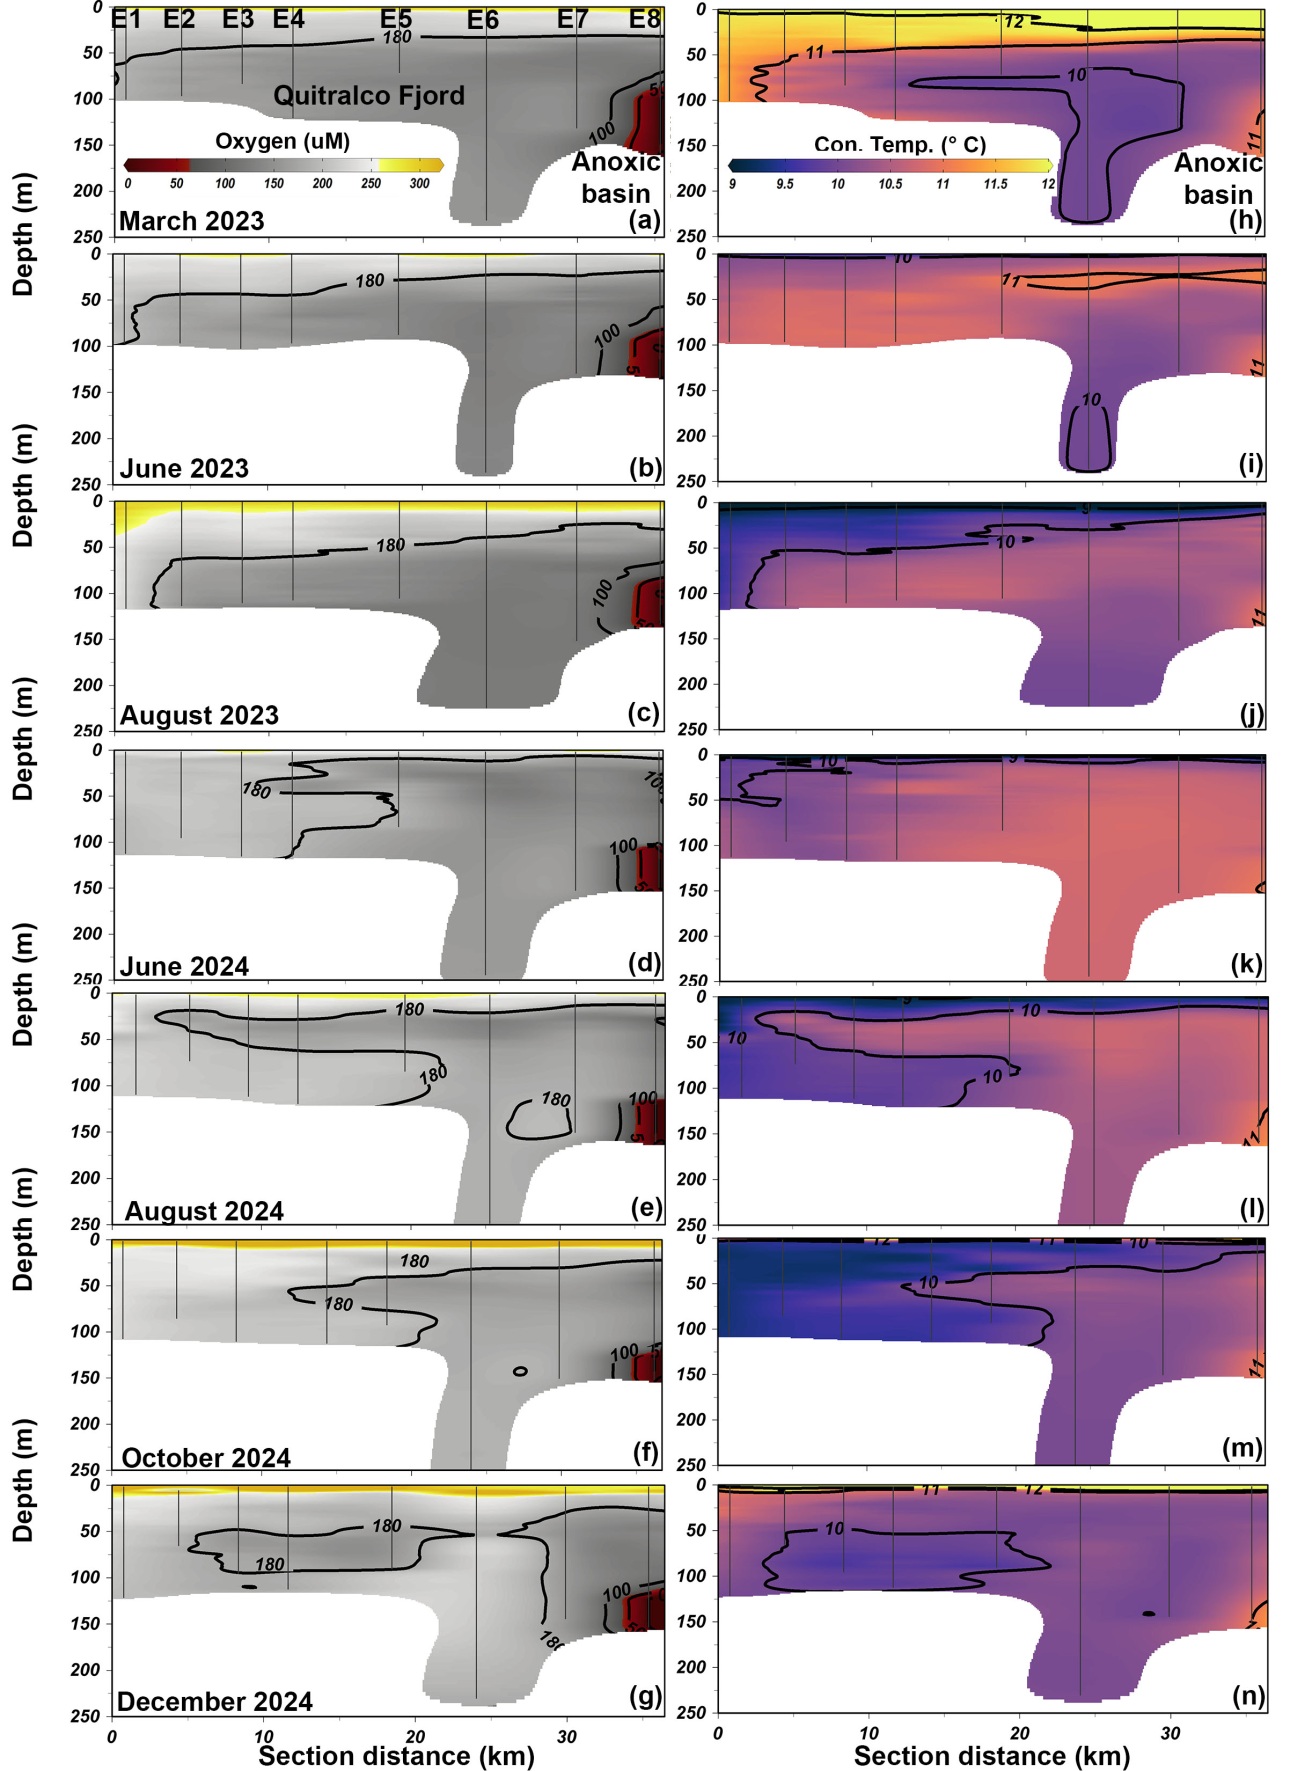
**

**Supplementary Figure 2.** Vertical sections from the fjord mouth (Station E1) to the head (Station E8) in Quitralco Fjord,

showing distribution of **(a-g)** dissolved oxygen and **(h-n)** water temperature during 2023 and 2024

expeditions.

**
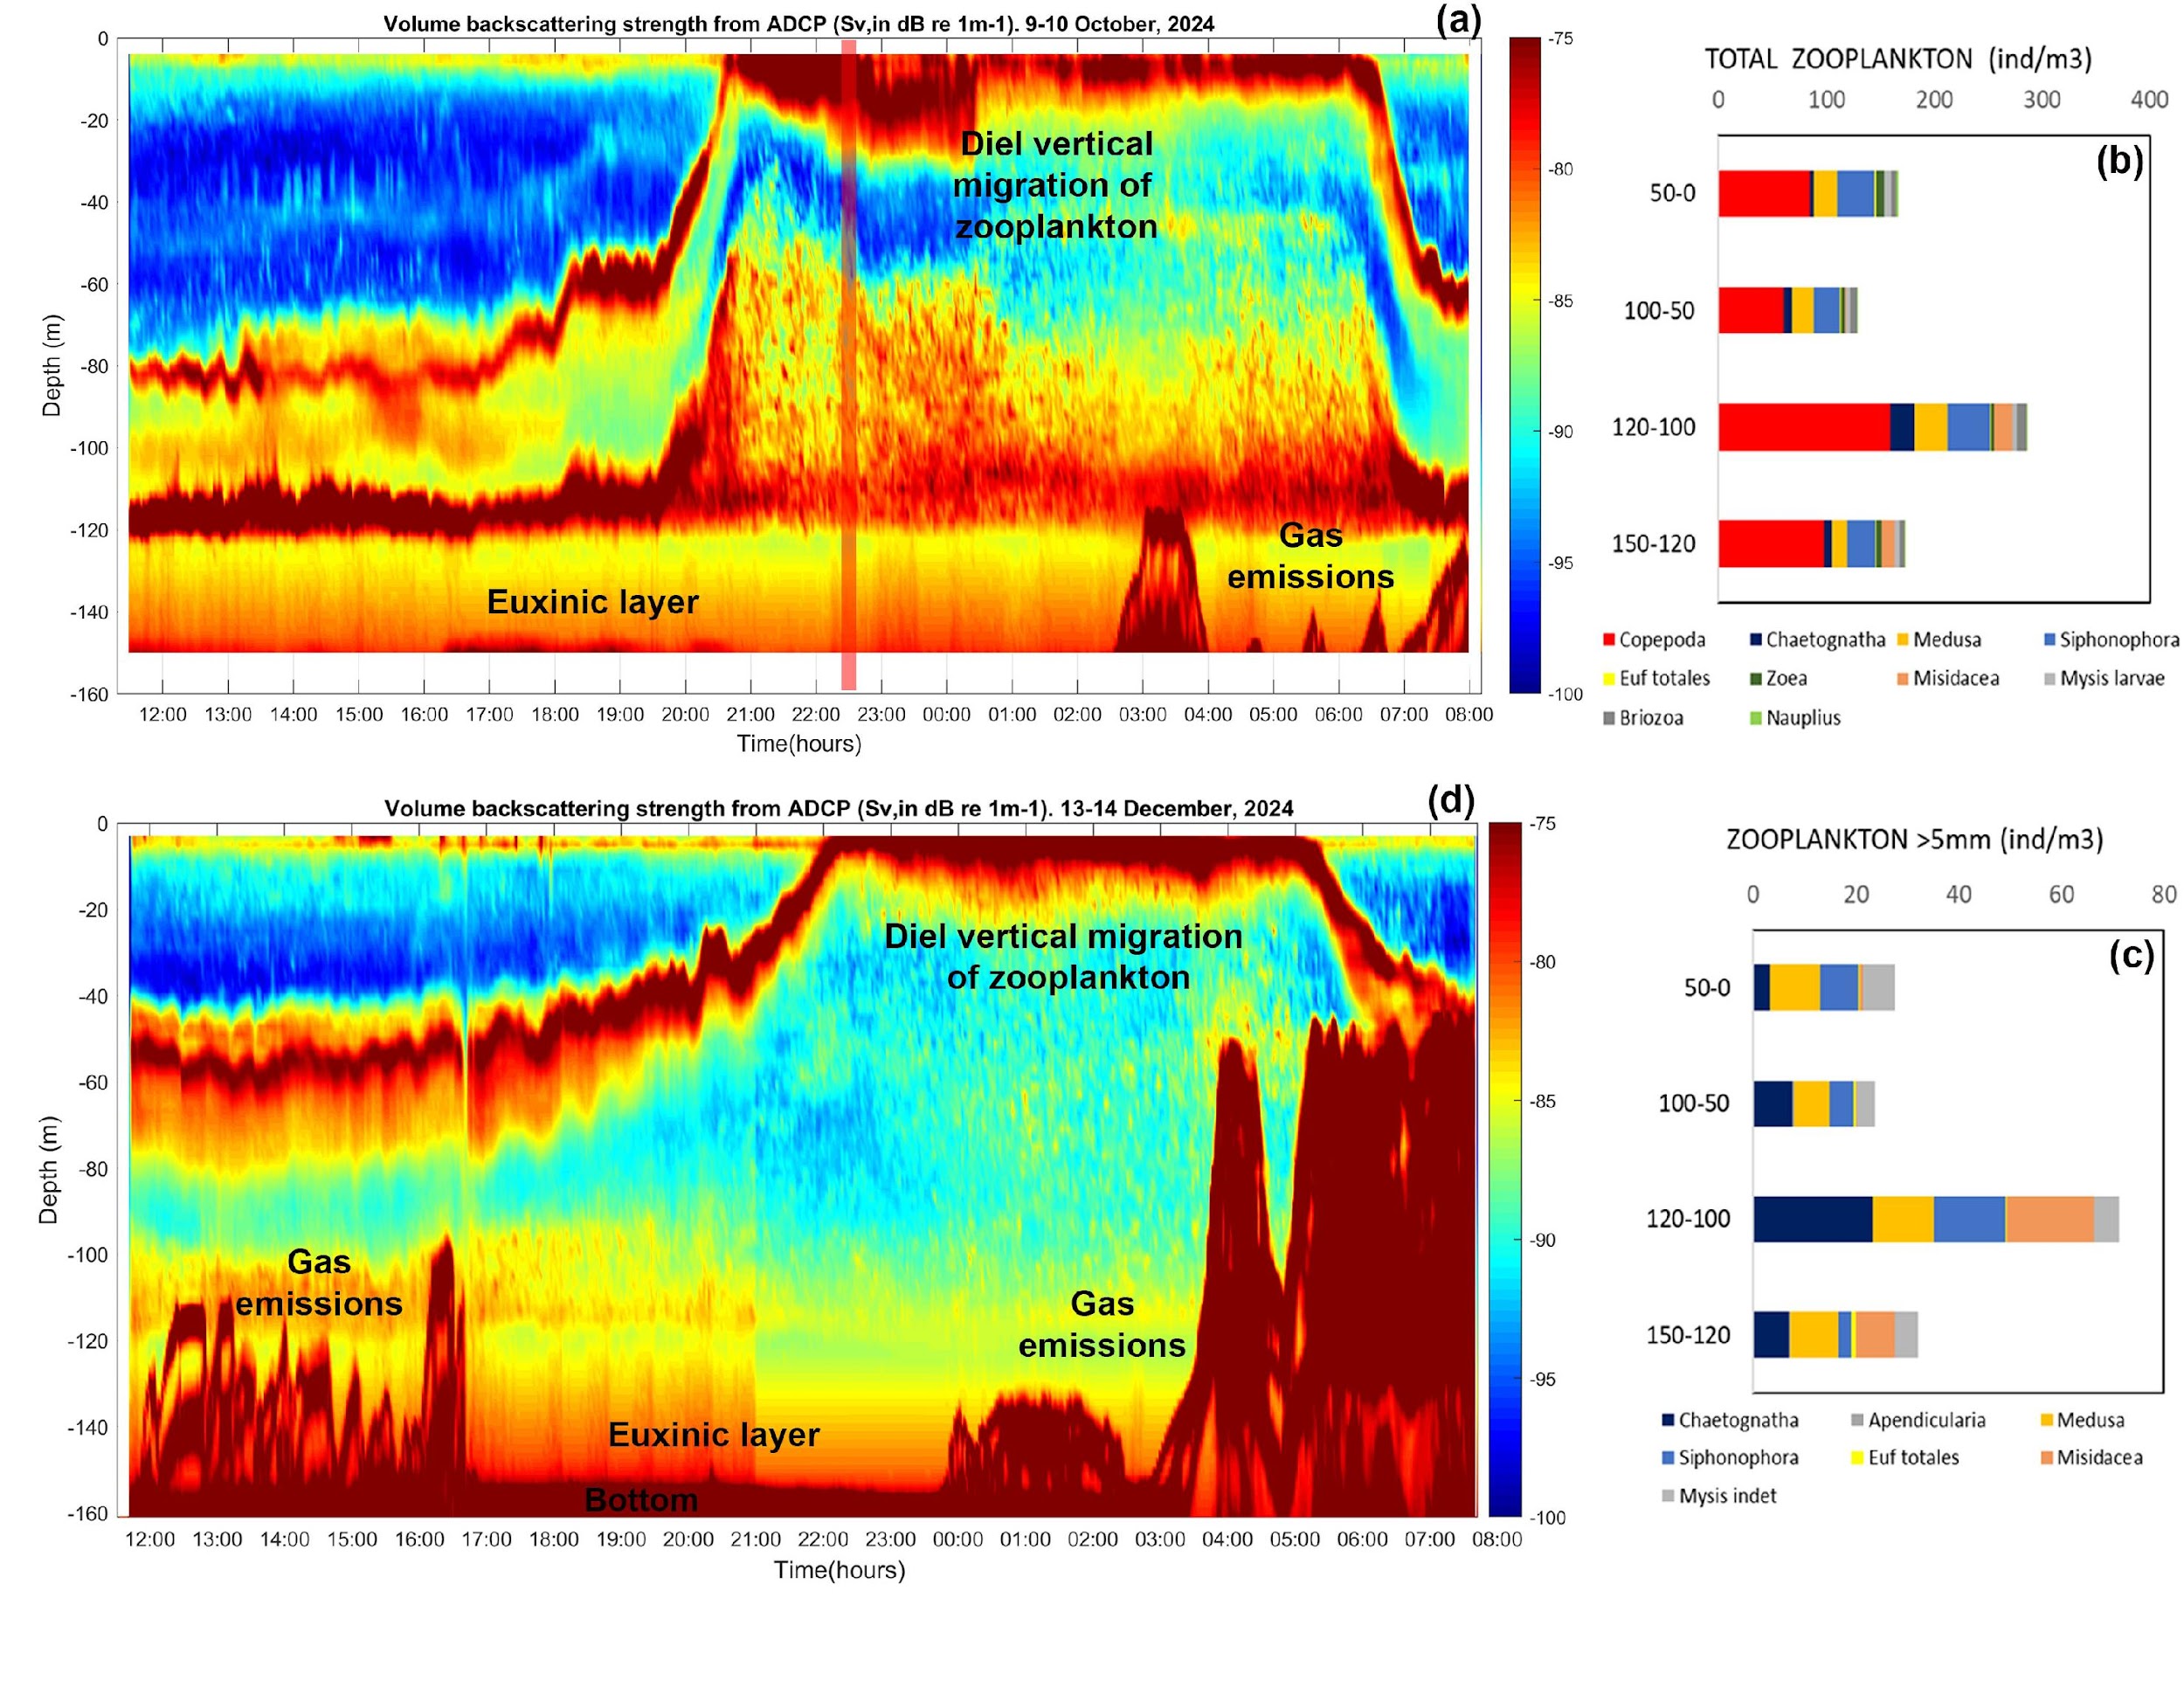
**

**Supplementary Figure 3.** (**a**) Volume backscattering strength recorded by a 300 kHz ADCP moored in the fjord basin, 9-10 October 2024; (**b**) Total zooplankton community sampled in situ to validate backscatter signal on 9-10 October 2024; (**c**) Zooplankton species > 5 mm, as detected by ADCP; and (**d**) Volume backscattering strength recorded by ADCP, moored at a similar location as (**a**) but from December 13-14, 2024. The red shaded rectangle in (**a**) indicates the period in which in-situ zooplankton sampling took place.


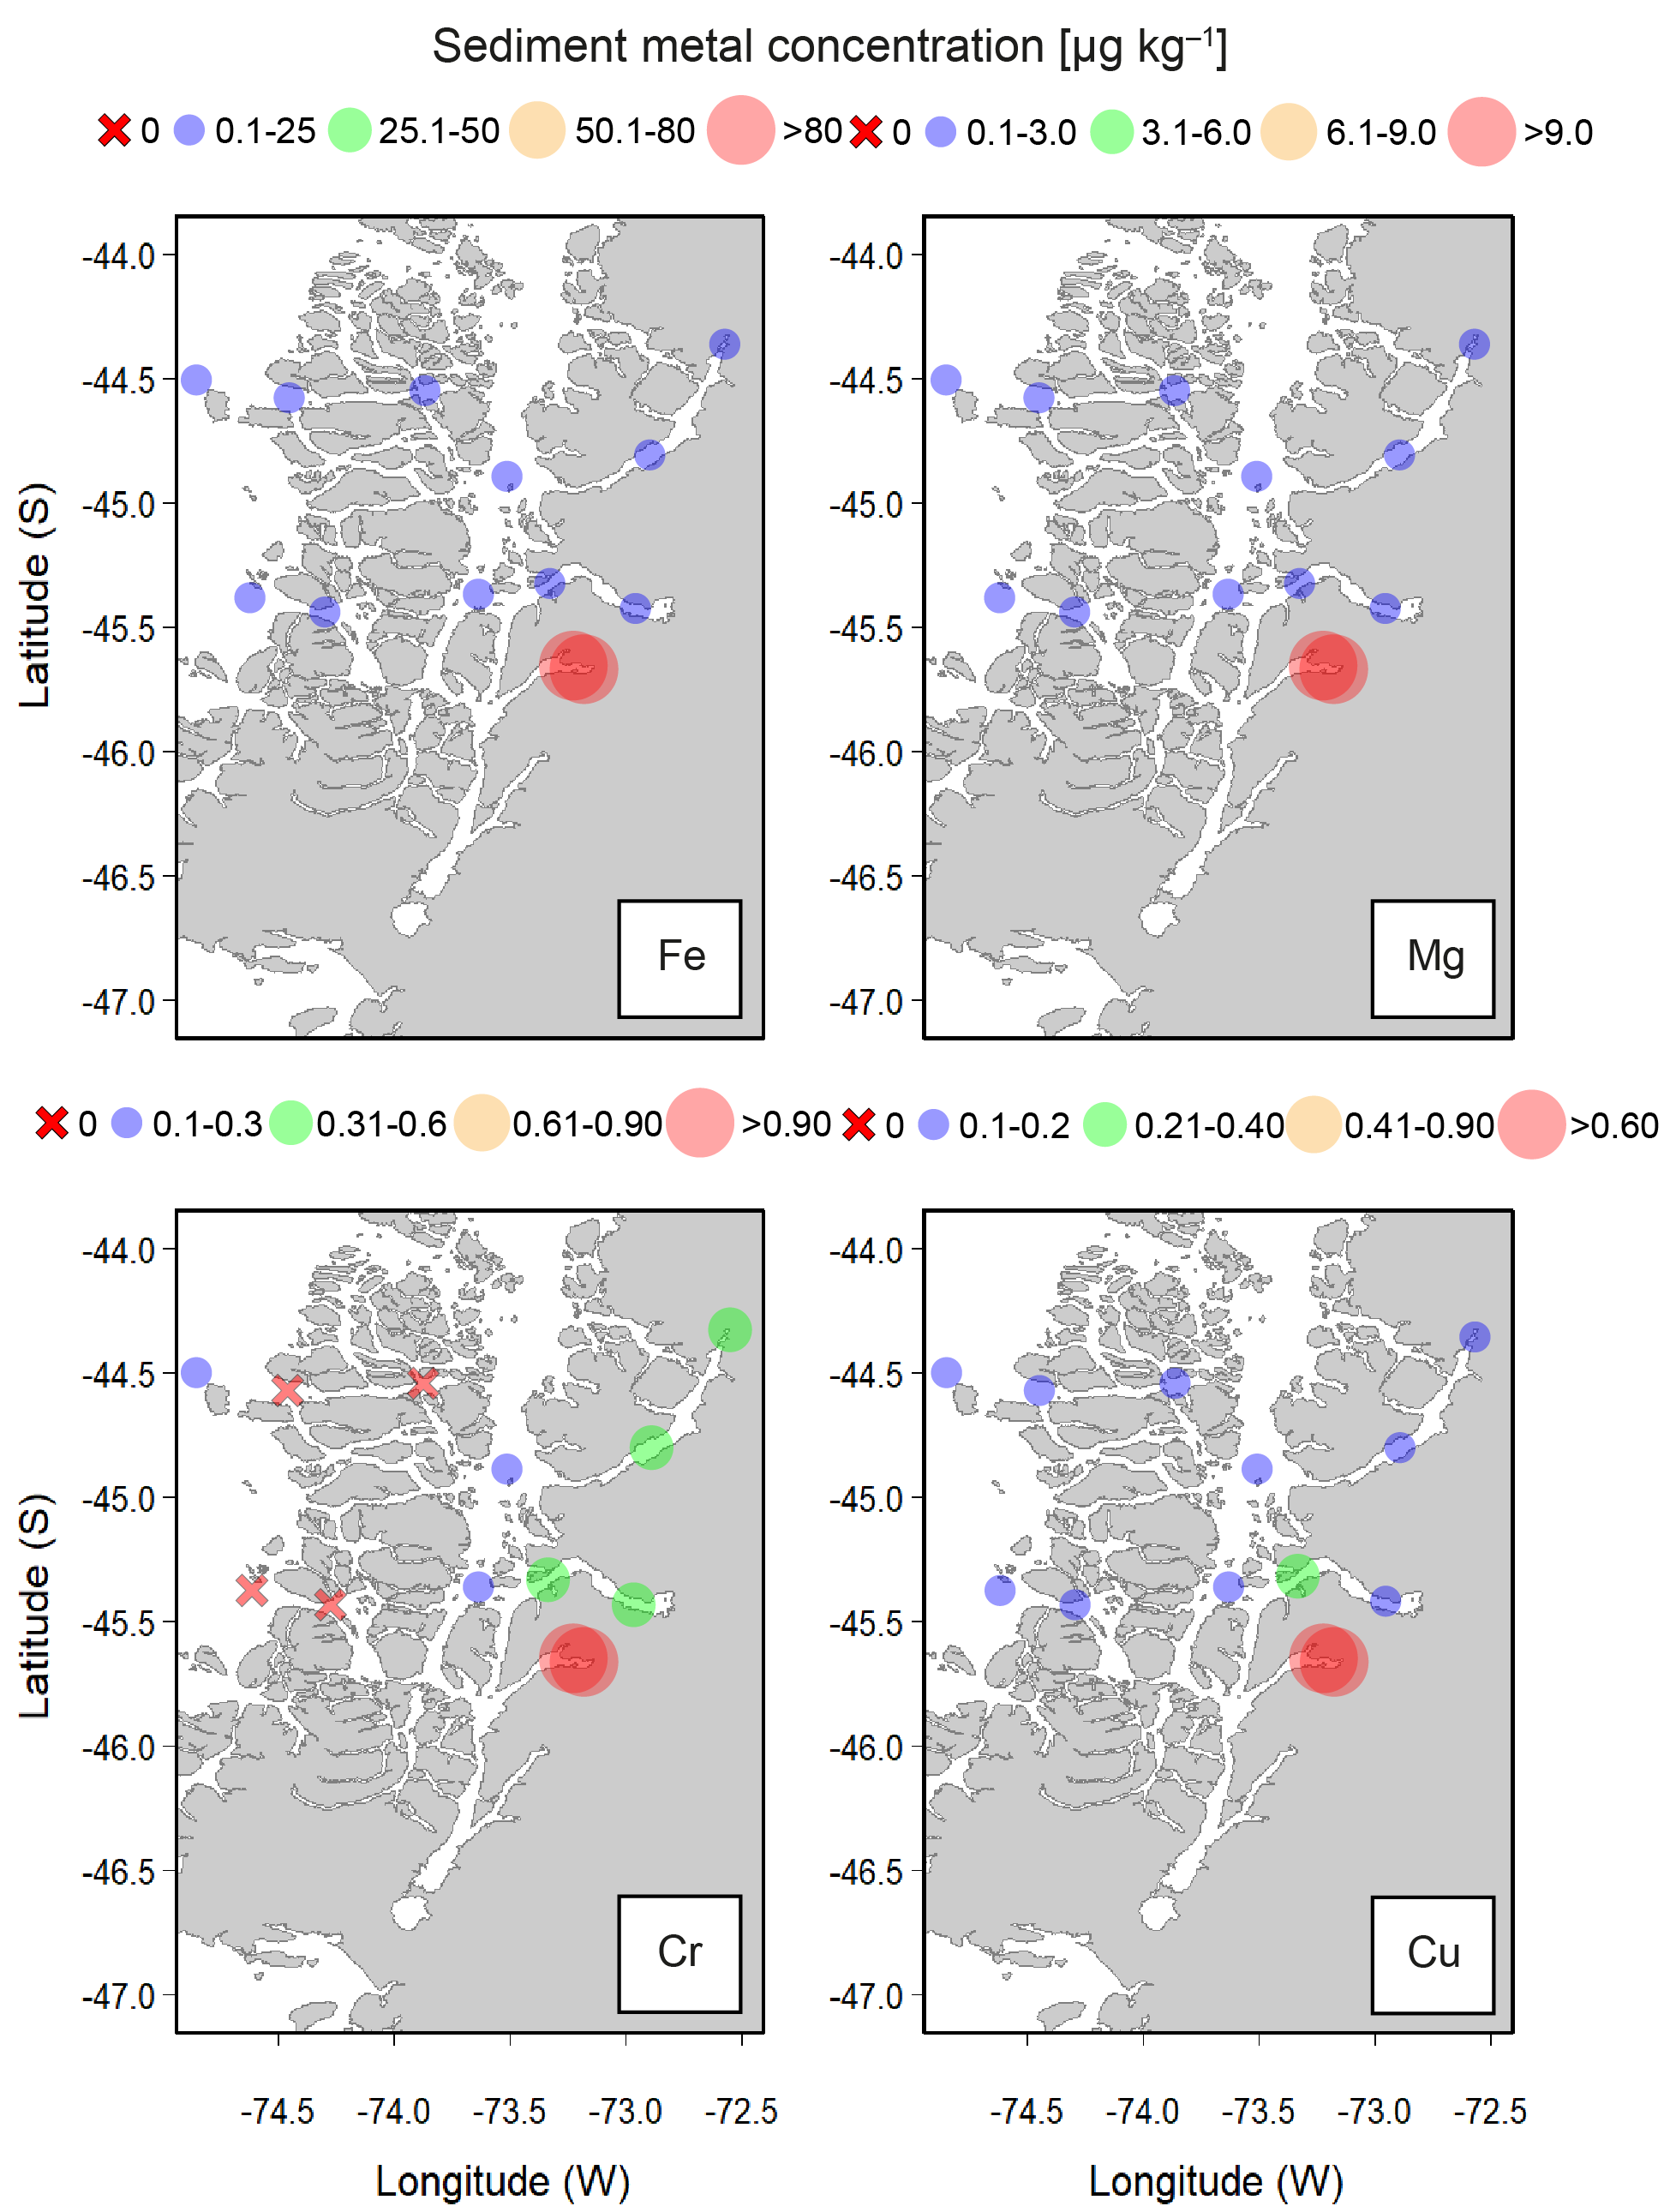


**Supplementary Figure 4.** Spatial distribution of arithmetic-mean concentrations of iron (Fe), magnesium (Mg),

chromium (Cr), and copper (Cu) in the sediments (µg kg*-*1) from across sites in the northern Patagonia fjord

system.

**Supplementary Figure 5**. Excitation-emission contour plots of four components (C1-C4), as determined by PARAFAC analysis model.

**Supplementary Figure 6**. Rarefaction curves for prokaryote assemblages from samples collected in waters at station E8, Quitralco Fjord.


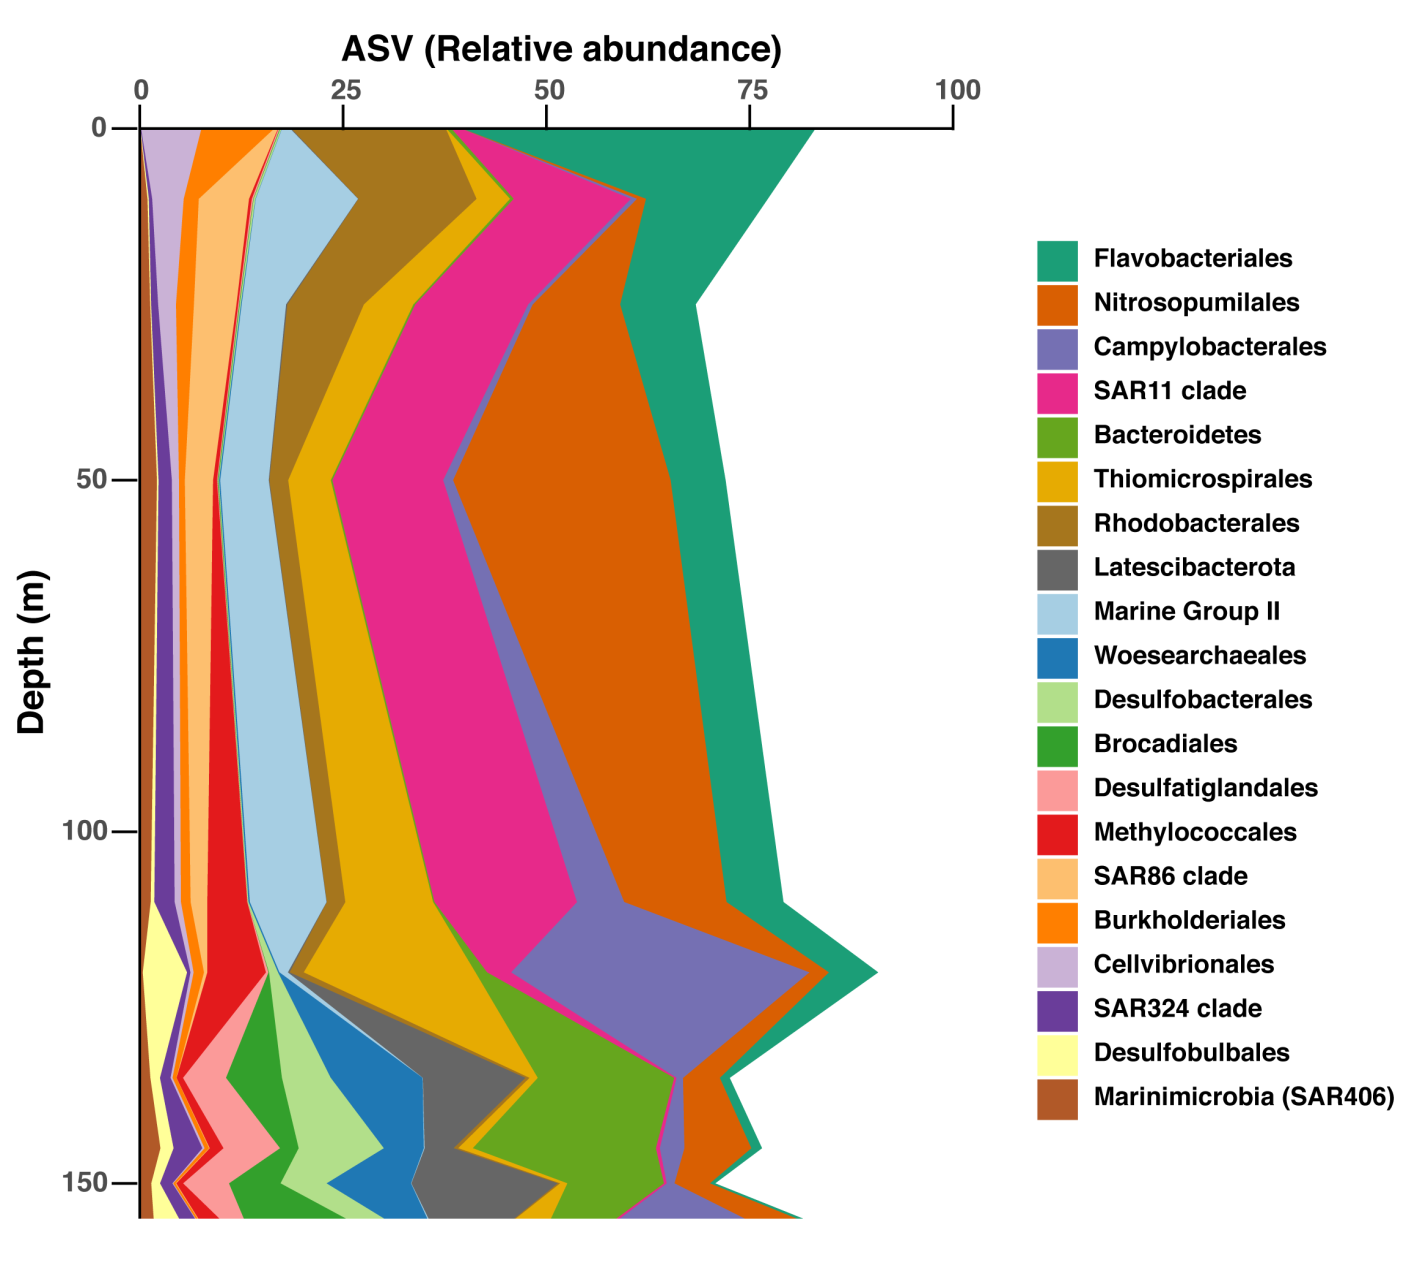


**Supplementary Figure 7**. Vertical profile of representative bacterial orders at station E8.
